# Supplementary material for: A High-Resolution Chronology of Rapid Forest Transitions following Polynesian Arrival in New Zealand
Source: PubMed Central journal article supplement (PMC4221023; doi:10.1371/journal.pone.0111328), 2014-11-05
Supplement: pone.0111328.s008.pdf [file pone.0111328.s008.pdf]

**Table S1. Radiocarbon Dating Information.** Summary of Conventional Radiocarbon Ages (CRA) in years Before Present (i.e., before 1950 AD) and CRA error ( $\pm$  yrs), for radiocarbon dated macrofossils Lake Kirkpatrick and Dukes Tarn, South Island, New Zealand.

| <b>Lab ID</b> | <b>Site (year core collected)</b> | <b>Material dated</b> | <b>Depth (cm)</b> | <b>CRA</b> | <b>CRA error</b> |
|---------------|-----------------------------------|-----------------------|-------------------|------------|------------------|
| KCCAMS-55542  | Dukes Tarn (2008)                 | leaf                  | 33-34             | 210        | 20               |
| KCCAMS-55541  | Dukes Tarn (2008)                 | leaf                  | 119-120           | 390        | 15               |
| KCCAMS-102198 | Dukes Tarn (2008)                 | twig                  | 129-130           | 710        | 15               |
| KCCAMS-102199 | Dukes Tarn (2008)                 | charcoal              | 131-132           | 680        | 20               |
| KCCAMS-102200 | Dukes Tarn (2008)                 | leaf                  | 132-133           | 710        | 30               |
| KCCAMS-102201 | Dukes Tarn (2008)                 | twig                  | 135-136           | 700        | 15               |
| KCCAMS-102202 | Dukes Tarn (2008)                 | leaf                  | 137-138           | 720        | 15               |
| KCCAMS-55540  | Dukes Tarn (2008)                 | leaf                  | 139-140           | 670        | 15               |
| KCCAMS-71876  | Dukes Tarn (2008)                 | leaf                  | 165-166           | 905        | 20               |
| KCCAMS-102187 | Lake Kirkpatrick (2009)           | leaf                  | 99-100            | 575        | 15               |
| KCCAMS-102188 | Lake Kirkpatrick (2009)           | char/seed             | 104-105           | 650        | 30               |
| KCCAMS-102189 | Lake Kirkpatrick (2009)           | char                  | 108-109           | 680        | 20               |
| KCCAMS-102190 | Lake Kirkpatrick (2009)           | leaf                  | 109-110           | 640        | 15               |
| KCCAMS-102191 | Lake Kirkpatrick (2009)           | char                  | 110-111           | 555        | 20               |
| KCCAMS-102192 | Lake Kirkpatrick (2009)           | twig                  | 111-112           | 750        | 15               |
| KCCAMS-102193 | Lake Kirkpatrick (2009)           | twig                  | 112-113           | 695        | 20               |
| KCCAMS-102194 | Lake Kirkpatrick (2009)           | wood                  | 113-114           | 635        | 15               |
| KCCAMS-102195 | Lake Kirkpatrick (2009)           | plant part            | 114-115           | 670        | 30               |
| KCCAMS-102196 | Lake Kirkpatrick (2009)           | leaf                  | 118-119           | 670        | 20               |
| KCCAMS-71877  | Lake Kirkpatrick (2009)           | woody material        | 119-120           | 645        | 15               |
| KCCAMS-102197 | Lake Kirkpatrick (2009)           | leaf                  | 121-122           | 710        | 15               |
| KCCAMS-71878  | Lake Kirkpatrick (2009)           | leaf                  | 191-192           | 1625       | 15               |
